1 Title:

2 Prospective validation of a seizure diary forecasting falls short

3

4 Running head:

5 Prospective validation of seizure forecasting

6

7 Daniel M. Goldenholz, MD PhD<sup>1,2</sup> [daniel.goldenholz@bidmc.harvard.edu](mailto:daniel.goldenholz@bidmc.harvard.edu)

8 Celena Eccleston, BS<sup>1,2</sup> [ceccleston6celena@gmail.com](mailto:ceccleston6celena@gmail.com)

9 Robert Moss, BA<sup>3</sup> [rob@seizuretracker.com](mailto:rob@seizuretracker.com)

10 M. Brandon Westover, MD, PhD<sup>1,2,4,5</sup> [mwestover@mgh.harvard.edu](mailto:mwestover@mgh.harvard.edu)

11

12 1 Dept. of Neurology, Beth Israel Deaconess Medical Center, Boston 02215 MA

13 2 Dept. of Neurology, Harvard Medical School, Boston 02215 MA

14 3 Seizure Tracker LLC, Springfield 22151 VA

15 4 Dept. of Neurology, Massachusetts General Hospital, Boston 02114 MA

16 5 McCance Center for Brain Health, Boston, 02114 MA

17

18 Corresponding author:

19 Daniel Goldenholz

20 330 Brookline Ave Baker 5

21 Boston MA 02215

22 617 632 8934

23 [daniel.goldenholz@bidmc.harvard.edu](mailto:daniel.goldenholz@bidmc.harvard.edu)

24

25 Title characters=62

26 Running head characters=45

27 Word count:

28 Abstract: 188

29 Body: \*

30 Number of figures: 1

31 Number of color figures: 1 \*(black and one figure for in-print version of paper)

32 Number of tables: 1

33

34  
35  
36  
37  
38  
39  
40  
41  
42  
43  
44  
45  
46  
47  
48  
49  
50  
51  
52  
53

**Abstract (max 300 words)**

OBJECTIVE: Recently, a deep learning AI model forecasted seizure risk using retrospective seizure diaries with higher accuracy than random forecasts. The present study sought to prospectively evaluate the same algorithm.

METHODS: We recruited a prospective cohort of 46 people with epilepsy; 25 completed sufficient data entry for analysis (median 5 months). We used the same AI method as in our prior study. Group-level and individual-level Brier Skill Scores (BSS) compared random forecasts and simple moving average forecasts to the AI.

RESULTS: The AI had an AUC of 0.82. At the group level, the AI outperformed random forecasting (BSS=0.53). At the individual level, AI outperformed random in 28% of cases. At the group and individual level, the moving average outperformed the AI. If pre-enrollment (non-verified) diaries (with presumed under-reporting) were included, the AI significantly outperformed both comparators. Surveys showed most did not mind poor quality LOW-RISK or HIGH-RISK forecasts, yet 91% wanted access to these forecasts.

SIGNIFICANCE: The previously developed AI forecasting tool did not outperform a very simple moving average forecasting this prospective cohort, suggesting that the AI model should be replaced.

54 **Key points**

55 A previously developed e-diary based AI seizure forecasting tool was prospectively tested.

56 Although by some metrics the tool was successful, the overall AI performance was

57 unacceptably low.

58 It was much easier to outperform a random forecast; it was much harder to outperform a

59 moving average forecast.

60 Using unverified diaries can skew forecasting metrics in favor of underperforming tools.

61

## 62 **Introduction**

63 Not knowing when the next seizure will happen reduces quality of life for people living with  
64 epilepsy. Roughly a decade ago, it was discovered that it is possible to provide seizure forecasts  
65 using invasive technology<sup>1</sup>. Since then, novel approaches involving highly invasive<sup>2-5</sup> and less  
66 invasive tools<sup>6,7</sup> have been proposed. Using a retrospective study of 5,419 unverified self-  
67 reported electronic diaries from Seizure Tracker, our group reported that 24-hour forecasts  
68 from seizure diaries alone were possible using deep learning<sup>8</sup>. The present study aimed to  
69 validate these findings prospectively.

70

## 71 **Methods**

### 72 Patients

73 The protocol was deemed Exempt by the BIDMC Institutional Review Board. Participants were  
74 recruited by Seizure Tracker<sup>9</sup> via email. Participants with 1) epilepsy, 2) age 18 or older, 3) an  
75 active Seizure Tracker e-diary account, 4) at least 3 seizures recorded in their account, and 5) at  
76 least 3 months of previous e-diary data were eligible. Verified participants linked their e-diary  
77 and a RedCap<sup>10,11</sup> survey account to the study. They completed an initial survey and then  
78 weekly surveys (verifying diary completion) for 5 months. They also maintained seizure e-  
79 diaries. For safety, only retrospective forecasts were provided monthly.

80

### 81 The AI forecaster

82 Using our pre-trained deep learning algorithm<sup>8</sup> (hereafter: AI), seizure forecasts were calculated  
83 for every day possible. The AI uses a recurrent neural network connected to a multilayer

84   perceptron trained on 3806 users (Appendix A). All model parameters and hyperparameters  
85   remained unchanged from the original model.  
86   The AI computes a probability of *any seizures* occurring within a 24-hour period. The AI uses the  
87   84-day trailing history of daily seizure counts leading up to that forecasted day as input. The  
88   tool was applied sequentially with a sliding window that moves forward one day at a time. Each  
89   patient could have up to 57 daily forecasts (8 weeks and one day), representing the prospective  
90   observation period. In some patients, this number was lower due to incomplete diary  
91   information (Appendix B). The 3-month pre-enrollment diaries were retained for additional  
92   analysis.

93

#### 94   The random forecaster

95   The daily AI forecast was compared with a permuted forecaster as a benchmark (hereafter  
96   “random”). The random forecaster is generated by permuting forecasts from the AI at the  
97   subject level. This can be thought of as shuffling a deck of cards, where each card is the AI  
98   forecast for a given day, and there is a different deck for each patient. A useful forecast should  
99   (at minimum) outperform a permuted forecaster<sup>12</sup>. Where appropriate, the average outcome  
100   metric from 1000 such permutations was used, such as for computing the Brier Score.

101

#### 102   The moving average forecaster

103   The daily AI forecast was also compared with a moving average forecaster which accounted for  
104   the typical seizure rate from each patient. Moving average forecasts were computed by taking  
105   the total number of seizure days in each trailing 84-day history and dividing by 84 to obtain a

106 simple estimate of daily risk of any seizures for the coming 24-hour forecast (Appendix A). Of  
107 note, unlike a similar comparator used our prior study (there called the “rate matched random”  
108 forecaster), this moving average forecaster uses total seizure days, not total seizure counts<sup>8</sup>.  
109 This change was made to provide a more stringent comparator for the AI. Also of note, all  
110 summary results were computed using only the verified post-enrollment period due to  
111 concerns about possible under-reporting during the pre-enrollment period (see Discussion).

112

113

#### 114 Outcome metrics

115 Performance of each model was measured using area under the receiver operating  
116 characteristic curve (AUC), and the Brier Score. AUC values range between 0 and 1, with 0.5  
117 representing a tool indistinguishable from coin flipping, and 1 representing a perfect  
118 discriminator. Brier Scores range between 0 and 1, with values closer to 0 representing higher  
119 accuracy. Our primary outcome (Appendix B) was comparing AI to the random forecasts using  
120 Brier Skill Scores (BSS). Brier Skill Score of 1 represents the AI algorithm is perfect, 0 indicates  
121 the AI is not better than the reference forecast, and -1 indicates the reference forecast is  
122 perfect).

123

124 BSS was computed both at the group-level and at the individual participant level. When using as  
125 reference test the random forecaster to calculate BSS, “group-level” means that random  
126 forecasts were generated by randomly shuffling the AI predictions across all patients, and  
127 randomly reassigning them. Note that this means that forecasts from one patient may be

128 randomly reassigned to other patients. By contrast, calculating BSS at the “individual level”  
129 relative to random forecasting means that random forecasts are all from the same patients,  
130 albeit in a randomly shuffled order. This means that the group and individual level BSS scores  
131 are not directly comparable, and the median of the individual-level BSS scores need not match  
132 the group-level BSS score. Additional BSS values were computed using the moving average as  
133 an alternative reference.

134  
135 Calibration curves were generated for the AI, random, and moving average forecasters using  
136 equally spaced bins. Confidence intervals for AUC and BSS values were obtained by 1000  
137 bootstrapped samples, selecting patients with replacement.  
138 Code is available here: <https://github.com/GoldenholzLab/deepManCode>.

139  
140 **Results**  
141 Of 46 recruited participants, 1 was ineligible, 3 were seizure-free, and 11 provided insufficient  
142 diary data. Within the remaining 31, there were 3 dropouts, and 8 who missed some of the  
143 weekly diary completeness responses. Only 25 patients had sufficient contiguous data to  
144 perform forecasts based on 3 months of prospectively collected history. Forecastable diary days  
145 (Appendix C) ranged 15-57 (median 57) days. Total seizures per patient ranged from 1-56,  
146 (median 13). Participant characteristics are summarized in Table 1.

147  
148 Group level results:

149 The following represent group level metrics (Figure 1). Confidence intervals were obtained via  
150 1000 bootstrapped samples with replacement at the patient level. The AUC for AI was: 0.82  
151 [95% CI 0.72-0.90], and for the permuted AI (i.e. random forecast) was 0.50 [95% CI 0.46-0.54].  
152 The Brier Score for AI was 0.14. The AI performed significantly better than the random  
153 forecaster at the group level, with a Brier Skill Score (AI vs. random) of 0.53 [95% CI 0.27-0.70].  
154 However, the AUC of the moving average forecaster was also 0.82 [95% CI 0.72-0.89], which  
155 was not significantly different from the AI (Mann Whitney U,  $p=0.13$ ); and the Brier Skill Score  
156 of the AI relative to the moving average forecaster was -0.01 [95% CI -0.04 - 0.02], suggesting  
157 minimal difference in performance.

158

#### 159 Individual level results:

160 In 7 patients (28%) the AI was superior (i.e., individual Brier Skill Score $>0$ ) to the random  
161 forecaster whereas for 9 patients (36%) the AI was superior to the moving average. The  
162 individual Brier Skill Scores (mean permuted AI forecasts<sup>12</sup> as comparator) were median 0.00  
163 (95% CI: -0.03 – 0.20). These values were notably lower than the group level BSS values (see  
164 Appendix I). Individual Brier Skill Scores with moving average as comparator were median -0.01  
165 with 95% confidence range (-0.08-0.17). Individual level AI AUC values were very poor quality  
166 0.43 +/- 0.21, as were individual level moving average values AUC 0.43 +/- 0.13.

167

168 Complete diaries with AI and moving average forecasts were plotted (Appendix D and E). There  
169 were 25 patients reporting less than 3 seizures in the pre-enrollment period (see Appendix D).  
170 Time-in-warning analysis was conducted (Appendix G).



171

172 The above analyses were also re-computed using the full set of 31 patients using the 3-month  
173 pre-enrollment diaries (Appendix F). This showed the AI was superior to random and moving  
174 average at the group level, and superior to the moving average at the individual level in 14  
175 patients (45%). However, pre-enrollment data seizure rate was dramatically lower than the  
176 enrollment seizure rates, suggesting severe under-reporting.

177

178 The initial surveys (n=46), filled out prior to any forecasting, included questions related to  
179 seizure forecasting (Appendix G). Many (52%) patients stated they would not mind poor quality  
180 HIGH-RISK forecasts, and many (52%) did not mind poor quality LOW-RISK forecasts, yet almost  
181 all (91%) wanted access to forecasts. In the setting of LOW-RISK forecasts, 80% said they would  
182 not change their behavior, yet in HIGH RISK only 28% would not change – many stated that they  
183 would avoid risk-taking behavior (54%).

184

## 185 **Discussion**

186 Our results prospectively attempted validation of a deep learning seizure forecasting system  
187 that is based entirely on seizure diaries. At the group level (considering all forecasts from all  
188 patients equally), one may mistakenly believe that the AI has strong potential. Using a random  
189 permutation surrogate as our comparator, the AI forecasts better than chance. However, a  
190 simple moving average forecaster turns out to perform just as well as the AI. Moreover, at the  
191 individual level (summarizing each patient separately first, then aggregating results), the AI  
192 outperforms the random permutation and the moving average in a small minority of cases,

193 showing very poor overall individual level performance in AUC and Brier scores. The present  
194 work mirrors the previous retrospective study<sup>8</sup>, however it focuses on the individual patient  
195 level with physician curated, verified complete diaries. By reporting multiple metrics in different  
196 ways, this study highlights deficiencies of the present AI algorithm, and in certain outcome  
197 metrics. Clearly, the AI is not better than moving average forecasts; however, when missing  
198 data is present, the AI outperforms the moving average.

199 Qualitatively, the data (Appendices D, E, F) suggests that at least one driver of periods of better  
200 forecasts relates to the AI being better able to forecast multi-day clusters of seizures compared  
201 with the random permutation or the moving average. These clusters may reflect multi-day  
202 seizure susceptibility periods, though they do not appear to be periodic<sup>3,13</sup>, and they do not fit  
203 the classical definition of seizure clusters<sup>14,15</sup>.

204

205 Unlike our retrospective study<sup>8</sup> that did not have verified complete diaries, the prospective  
206 study utilized weekly verified diaries from patients with clinical data confirming their epilepsy  
207 diagnosis. The misalignment of results between the former study and the present one may  
208 reflect the difference between the self-report and closely monitored self-report. In the case of  
209 the former, some events may be missed (under-reporting<sup>16</sup>), but in the case of the latter, some  
210 dubious events may be included (over-reporting<sup>1</sup>). There are no rigorous studies of over-  
211 reporting, which is challenging to accurately quantify. Here, the verified diaries have  
212 dramatically higher rates during the prospective phase compared to the pre-enrollment 3-  
213 month periods (see Appendix D) – strongly suggesting under-reporting.

214 The apparent under-reporting from the pre-enrollment period appears to reflect that without  
215 supervision, diaries might be incomplete. Our study required for enrollment the existence of a  
216 Seizuretracker account with at least 3-months of data prior to enrollment, however we did not  
217 verify or demand that such diaries were complete. This oversight is significant, because during  
218 the observed portion of the study we asked the participants weekly if their diaries were  
219 complete, and the seizure rates were consistently much higher (see Appendix D). Importantly,  
220 multiple lines of evidence<sup>13,17-21</sup> show that, contrary to what we observed in our cohort,  
221 unverified seizure diaries often do reproduce patterns confirmed in verified systems, thus  
222 unsupervised seizure diaries may not always suffer from underreporting bias. Nevertheless,  
223 future studies will need to either confirm with participants that pre-enrollment diaries are  
224 complete or obtain longer duration observation periods and use only data obtained during  
225 confirmed timeframes.

226  
227 Perhaps, one might suspect that patients with very high seizure rates would be unlikely to  
228 benefit from seizure forecasts at all. On the other hand, our cohort included only patients who  
229 wanted to be involved in a forecasting study (there was no compensation for this study), and  
230 39% of them had very high seizure rates. Patient preferences (Appendix G) may even support  
231 inaccurate forecasts rather than no forecasts. It is worthwhile to note that the preferences  
232 reported were obtained prior to obtaining any forecasts from our team, therefore these can be  
233 viewed as the opinion of optimistic patients who had just enrolled in a study. Nevertheless,  
234 patients with less frequent seizure days are likely the most important to forecast (based on the  
235 need to make temporary changes in behavior), and the present algorithm did not excel in this

236 area. More study is needed to better understand what the characteristics are of patients who  
237 would be most interested in seizure forecasts, and who would benefit most. It should be  
238 emphasized that in the absence of a nearly perfect forecast system, patients should never be  
239 encouraged to engage in risky behavior during periods of forecasted low risk.

240  
241 The present study has several limitations. First, some people with epilepsy have very low (e.g.,  
242 1-2 seizures per year) or very high (i.e.,  $\geq$ daily) seizure rates<sup>22</sup>. Such patients would not be likely  
243 to benefit from the current generation of daily forecasting tools. Second, it can be challenging  
244 for patients to maintain a seizure diary<sup>23</sup>, thus limiting tools of this nature to patients and  
245 caregivers willing to maintain a diary. Third, our prior<sup>8</sup> and present study did not have available  
246 EEG data to augment forecasts. Although speculative, including EEG data may enhance the  
247 performance of these models. Fourth, the 5-month prospective duration of the present study  
248 may be too short to make definitive conclusions about the utility of the AI algorithm. To  
249 address this deficiency, our group will be conducting a larger study soon with a longer  
250 observation period to allow for sufficiently large windows of investigator-verified seizure  
251 diaries. Sixth, there was a presumed dramatic under-reporting in the pre-enrollment period. In  
252 our future study, we will not include a pre-enrollment period due to the challenges in verifying  
253 that they are complete. Finally, the choice of reference standard comes at a cost. Our average  
254 permutation (a.k.a. random) forecaster standard could not be realistically provided to patients  
255 in real-time. Conversely, our second reference standard was the moving average forecaster.  
256 This can be implemented in a real-time system, making it a realistic comparator. A comparison  
257 of the calibration curve (Figure 1) shows very poor calibration of the permuted AI, but decent

258 calibration of moving average and AI. In using both, we highlight the advantages and  
259 disadvantages of each.

260

261 We hope that future advances in wearables<sup>6</sup> and minimally invasive tools<sup>7,24</sup> can synergistically  
262 be applied to diary-based forecasting tools to achieve higher accuracy and wider patient  
263 appeal.

264

265 **Data availability:**

266 Data is available on reasonable request.

267

268 **Epilepsia ethical publication statement:**

269 We confirm that we have read the Journal's position on issues involved in ethical publication  
270 and affirm that this report is consistent with those guidelines.

271

272 **Acknowledgements and Funding**

273 DMG was supported by NINDS KL2TR002542 and K23NS124656. MBW received funding support  
274 from the American Academy of Sleep Medicine through an AASM Foundation Strategic  
275 Research Award; the NIH (R01NS102190, R01NS102574, R01NS107291, RF1AG064312,  
276 RF1NS120947, R01AG073410), and NSF (2014431). Dr. Westover is a co-founder of Beacon  
277 Biosignals, and Director for Data Science for the McCance Center for Brain Health.

278

279 **Author contributions**

280 DG, MW, and RM contributed to conception and design of the study; CE, DG and RM  
281 contributed to acquisition and analysis of data; DG drafted a significant portion of the  
282 manuscript and figures.

283

#### 284 **Potential Conflicts of interest**

285 There are no conflicts of interest for any of the authors.

286

#### 287 **References**

- 288 1. Cook MJ, O'Brien TJ, Berkovic SF, Murphy M, Morokoff A, Fabinyi G, et al.  
289 Prediction of seizure likelihood with a long-term, implanted seizure advisory  
290 system in patients with drug-resistant epilepsy: A first-in-man study. *Lancet*  
291 *Neurol*. 2013; 12(6):563–71.
- 292 2. Leguia MG, Andrzejak RG, Rummel C, Fan JM, Mirro EA, Tcheng TK, et al. Seizure  
293 Cycles in Focal Epilepsy. *JAMA Neurol* [Internet]. 2021; 78(4):454–63. Available  
294 from: <http://www.ncbi.nlm.nih.gov/pubmed/33555292>
- 295 3. Baud MO, Kleen JK, Mirro EA, Andrechak JC, King-Stephens D, Chang EF, et al.  
296 Multi-day rhythms modulate seizure risk in epilepsy. *Nat Commun* [Internet].  
297 2018; 9(1):1–10. Available from: <http://dx.doi.org/10.1038/s41467-017-02577-y>
- 298 4. Proix T, Truccolo W, Leguia MG, Tcheng TK, King-Stephens D, Rao VR, et al.  
299 Forecasting seizure risk in adults with focal epilepsy: a development and validation  
300 study. *Lancet Neurol* [Internet]. 2021; 20(2):127–35. Available from:  
301 <http://www.ncbi.nlm.nih.gov/pubmed/33341149>
- 302 5. Nasser M, Pal Attia T, Joseph B, Gregg NM, Nurse ES, Viana PF, et al. Ambulatory  
303 seizure forecasting with a wrist-worn device using long-short term memory deep  
304 learning. *Sci Rep* [Internet]. 2021; 11(1):21935. Available from:  
305 <http://www.ncbi.nlm.nih.gov/pubmed/34754043>
- 306 6. Karoly PJ, Stirling RE, Freestone DR, Nurse ES, Maturana MI, Halliday AJ, et al.  
307 Multiday cycles of heart rate are associated with seizure likelihood: An  
308 observational cohort study. *EBioMedicine* [Internet]. 2021 [cited 2021];  
309 72:103619. Available from: <https://pubmed.ncbi.nlm.nih.gov/34649079/>
- 310 7. Viana PF, Pal Attia T, Nasser M, Duun-Henriksen J, Biondi A, Winston JS, et al.  
311 Seizure forecasting using minimally invasive, ultra-long-term subcutaneous  
312 electroencephalography: Individualized inpatient models. *Epilepsia* [Internet].  
313 2022; . Available from: <http://www.ncbi.nlm.nih.gov/pubmed/35395101>
- 314 8. Goldenholz DM, Goldenholz SR, Romero J, Moss R, Sun H, Westover B.  
315 Development and Validation of Forecasting Next Reported Seizure Using e-Diaries.

- 316 Ann Neurol [Internet]. 2020; 88(3):588–95. Available from:  
317 <http://www.ncbi.nlm.nih.gov/pubmed/32567720>
- 318 9. Casassa C, Rathbun Levit E, Goldenholz DM. Opinion and Special Articles: Self-  
319 management in epilepsy: Web-based seizure tracking applications. *Neurology*.  
320 2018; 91(21).
- 321 10. Harris PA, Taylor R, Minor BL, Elliott V, Fernandez M, O’Neal L, et al. The REDCap  
322 consortium: Building an international community of software platform partners. *J*  
323 *Biomed Inform*. 2019; 95:103208.
- 324 11. Harris PA, Taylor R, Thielke R, Payne J, Gonzalez N, Conde JG. Research electronic  
325 data capture (REDCap)--a metadata-driven methodology and workflow process for  
326 providing translational research informatics support. *J Biomed Inform*. 2009;  
327 42(2):377–81.
- 328 12. Karoly PJ, Ung H, Grayden DB, Kuhlmann L, Leyde K, Cook MJ, et al. The circadian  
329 profile of epilepsy improves seizure forecasting. *Brain*. 2017; 140(8):2169–82.
- 330 13. Karoly PJ, Goldenholz DM, Freestone DR, Moss RE, Grayden DB, Theodore WH, et  
331 al. Circadian and circaseptan rhythms in human epilepsy: a retrospective cohort  
332 study. *Lancet Neurol* [Internet]. 2018; 17(11):977–85. Available from:  
333 <http://www.ncbi.nlm.nih.gov/pubmed/30219655>
- 334 14. Haut SR. Seizure clusters: characteristics and treatment. *Curr Opin Neurol*  
335 [Internet]. 2015; 28(2):143–50. Available from:  
336 <http://www.ncbi.nlm.nih.gov/pubmed/25695133>
- 337 15. Chiang S, Haut SR, Ferastraoaru V, Rao VR, Baud MO, Theodore WH, et al.  
338 Individualizing the definition of seizure clusters based on temporal clustering  
339 analysis. *Epilepsy Res*. 2020; 163.
- 340 16. Elger CE, Hoppe C. Diagnostic challenges in epilepsy: seizure under-reporting and  
341 seizure detection. *Lancet Neurol* [Internet]. 2018; 17(3):279–88. Available from:  
342 <http://www.ncbi.nlm.nih.gov/pubmed/29452687>
- 343 17. Goldenholz DM, Westover MB. Flexible realistic simulation of seizure occurrence  
344 recapitulating statistical properties of seizure diaries. *Epilepsia* [Internet]. 2023;  
345 64(2):396–405. Available from: <http://www.ncbi.nlm.nih.gov/pubmed/36401798>
- 346 18. Goldenholz DM, Goldenholz SR, Moss R, French J, Lowenstein D, Kuzniecky R, et al.  
347 Is seizure frequency variance a predictable quantity? *Ann Clin Transl Neurol*. 2018;  
348 5(2):201–7.
- 349 19. Goldenholz DM, Goldenholz SR, Moss R, French J, Lowenstein D, Kuzniecky R, et al.  
350 Does accounting for seizure frequency variability increase clinical trial power?  
351 *Epilepsy Res* [Internet]. 2017; 137(June):145–51. Available from:  
352 <http://dx.doi.org/10.1016/j.epilepsyres.2017.07.013>
- 353 20. LaGrant B, Goldenholz DM, Braun M, Moss RE, Grinspan ZM. Patterns of Recording  
354 Epileptic Spasms in an Electronic Seizure Diary Compared With Video-EEG and  
355 Historical Cohorts. *Pediatr Neurol* [Internet]. 2021; 122:27–34. Available from:  
356 <https://doi.org/10.1016/j.pediatrneurol.2021.04.008>
- 357 21. Goldenholz DM, Tharayil J, Moss R, Myers E, Theodore WH. Monte Carlo  
358 simulations of randomized clinical trials in epilepsy. *Ann Clin Transl Neurol*. 2017;  
359 4(8):544–52.

- 360           22.    Ferastraoar V, Goldenholz DM, Chiang S, Moss R, Theodore WH, Haut SR.  
361            Characteristics of large patient-reported outcomes: Where can one million  
362            seizures get us? *Epilepsia Open* [Internet]. 2018; 3(3):364–73. Available from:  
363            <http://www.ncbi.nlm.nih.gov/pubmed/30187007>  
364           23.    Fisher RS, Blum DE, DiVentura B, Vannest J, Hixson JD, Moss R, et al. Seizure  
365            diaries for clinical research and practice: limitations and future prospects. *Epilepsy*  
366            *Behav.* 2012; 24(3):304–10.  
367           24.    Stirling RE, Grayden DB, D’Souza W, Cook MJ, Nurse E, Freestone DR, et al.  
368            Forecasting Seizure Likelihood With Wearable Technology. *Front Neurol.* 2021;  
369            12(July):1–12.  
370

371



372 **Figure 1: Calibration curves.** The prospective seizure forecasts (pooled across all patients) are  
373 compared to the actual observed seizures for (1) the artificial intelligence (AI), (2) the rate  
374 matched random forecast (RMR), and (3) random permutations of the AI. Confidence intervals  
375 are shown by bootstrapping 1000 times (choosing patients with replacement). A perfectly  
376 calibrated (dashed line) forecast would always forecast the correct percentage of observed  
377 seizures. In this figure, the AI and random forecast deviate from the ideal somewhat, whereas  
378 the permuted reference is very poorly calibrated (as expected).

379

380

|                                   | Number | %    |
|-----------------------------------|--------|------|
| Number of patients                | 31     |      |
| Females (%)                       | 14     | 45%  |
| Physician confirmed epilepsy      | 31     | 100% |
| EEG confirmed epilepsy            |        |      |
| Yes                               | 27     | 87%  |
| Unsure                            | 4      | 13%  |
| Handedness (right / left / mixed) |        |      |
| Right                             | 23     | 74%  |
| Left                              | 6      | 19%  |
| Mixed                             | 2      | 6%   |
| Epilepsy type                     |        |      |
| Generalized                       | 8      | 26%  |
| Focal                             | 11     | 35%  |
| Focal + Generalized               | 8      | 26%  |
| Unknown                           | 4      | 13%  |
| Epilepsy location                 |        |      |
| Frontal                           | 1      | 3%   |
| Temporal                          | 6      | 19%  |
| Parietal                          | 0      | 0%   |
| Occipital                         | 1      | 3%   |
| Multifocal                        | 2      | 6%   |
| Unknown                           | 21     | 68%  |
| Epilepsy cause                    |        |      |

|                            |    |     |
|----------------------------|----|-----|
| Structural                 | 9  | 29% |
| Genetic                    | 6  | 19% |
| Infectious                 | 1  | 3%  |
| Metabolic                  | 0  | 0%  |
| Immune                     | 0  | 0%  |
| Unknown                    | 15 | 48% |
| Prior epilepsy surgery (%) | 16 | 52% |

381

382 **TABLE 1:** Baseline characteristics of participants in the prospective study. Note, 31 patients had  
383 sufficient information to proceed to analysis, however 6 did not have sufficient data for analysis  
384 involving forecasts made only from 3 months of prospectively collected history.

### Calibration Curve

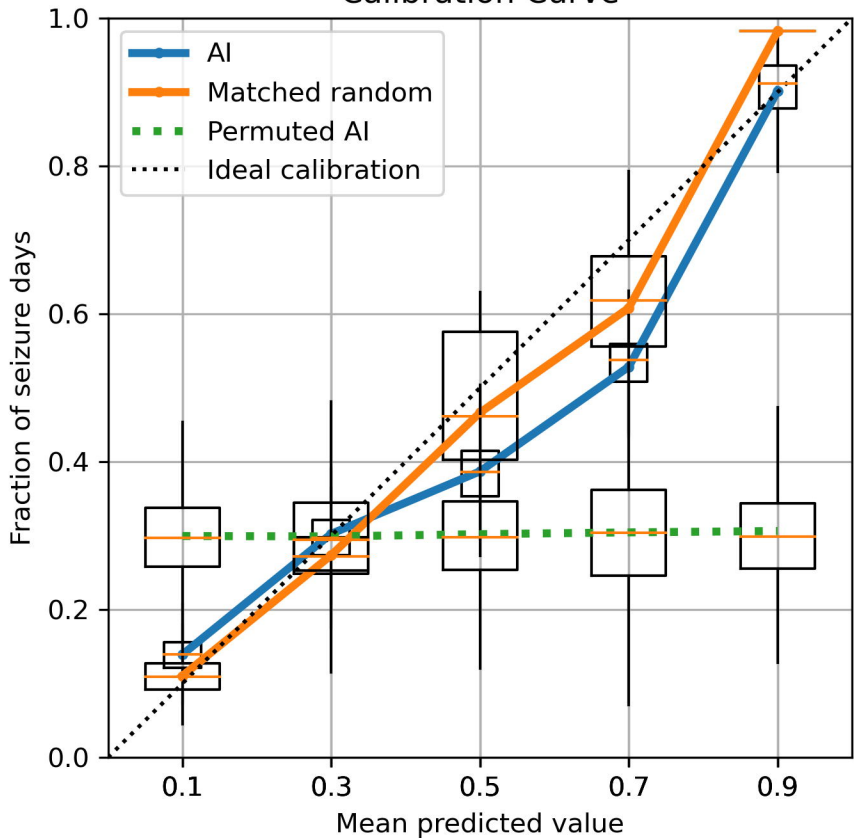

Source: https://www.medrxiv.org/content/10.1101/2024.01.11.24301175v1.full.pdf
